# Supplementary material for: Self-coacervation of modular squid beak proteins – a comparative study
Source: Royal Society of Chemistry journal article supplement (doi:10.1039/c7sm01352c), 2017-01-01
Supplement: c7sm01352c1.pdf [file c7sm01352c1.pdf]

Supplementary Material (ESI) for Soft Matter

This journal is © The Royal Society of Chemistry 2017

## Self-Coacervation of Modular Squid Beak Proteins – A Comparative Study

Cai Hao,<sup>a,†</sup> Bartosz Gabryelczyk,<sup>a,†</sup> Malathy S. S. Manimekalai,<sup>b</sup> Gerhard Grüber,<sup>b</sup> Stefan Salentinig,<sup>c</sup> and Ali Miserez<sup>a,b,\*</sup>

<sup>a</sup> Center for Biomimetic Sensor Science, School of Materials Science and Engineering, Nanyang Technological University (NTU), 50 Nanyang Avenue, Singapore 637553

<sup>b</sup> School of Biological Sciences, NTU, 60 Nanyang Drive, Singapore 637551

<sup>c</sup> Laboratory for Biointerfaces, Department Materials Meet Life, Empa, CH-2014 St-Gallen, Switzerland

\* Author for correspondence: ali.miserez@ntu.edu.sg

† Equal contribution

**Table S1.** List of buffers used in studies of HBP-1 and -2 coacervation at different pH and ionic strength.

| Ph range | Buffer (60 mM)   |
|----------|------------------|
| 4 – 5.5  | Sodium acetate   |
| 6        | MES              |
| 6.5 – 8  | Sodium phosphate |
| 9        | Tris             |
| 10       | CAPS             |

Each buffer was prepared at 0.1 M, 0.5 M, and 1 M ionic strength (adjusted with NaCl).

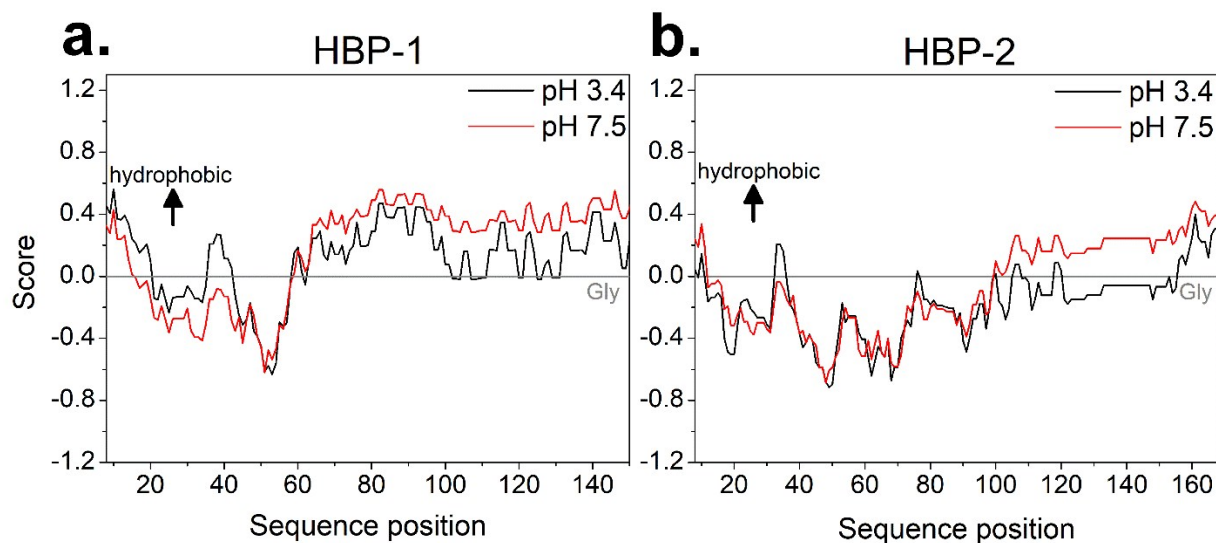

**Figure S1.** Hydropathy plot of **(a)** HBP-1 and **(b)** HBP-2 at different pHs. Hydrophobic index of HBPs calculated using ProtScale tool available online at <http://web.expasy.org/protscale>. Hydrophobicity indices at pH 3.4 and 7.5 determined by HPLC (Ref. 33, manuscript); window size: 9; scale not normalized; relative weight for window edges: 100 %; weight variation model: linear.

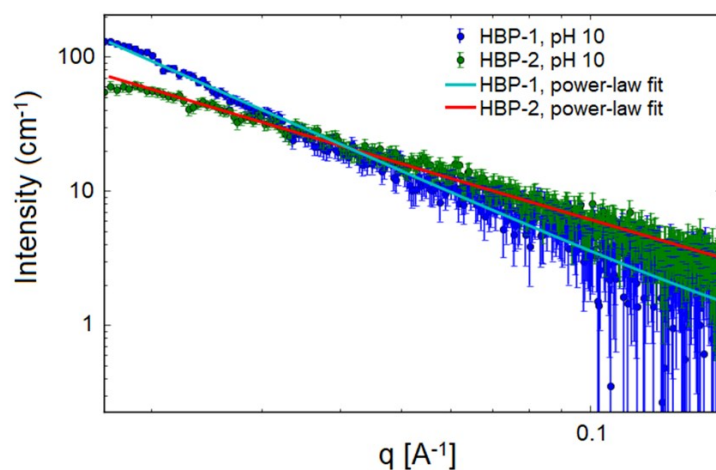

**Figure S2.** Experimental SAXS curves and power-law fits for HBPs scattering at pH 10. Both coacervate particles appear elongated and larger at this pH. HBP-2 follows a  $q^{-1}$  behaviour characteristic for elongated particles and unfolded proteins, whereas HBP-1 appears closer to  $q^{-2}$  (scattering typical for Gaussian polymer chains), indicating a partly folded state of the protein.

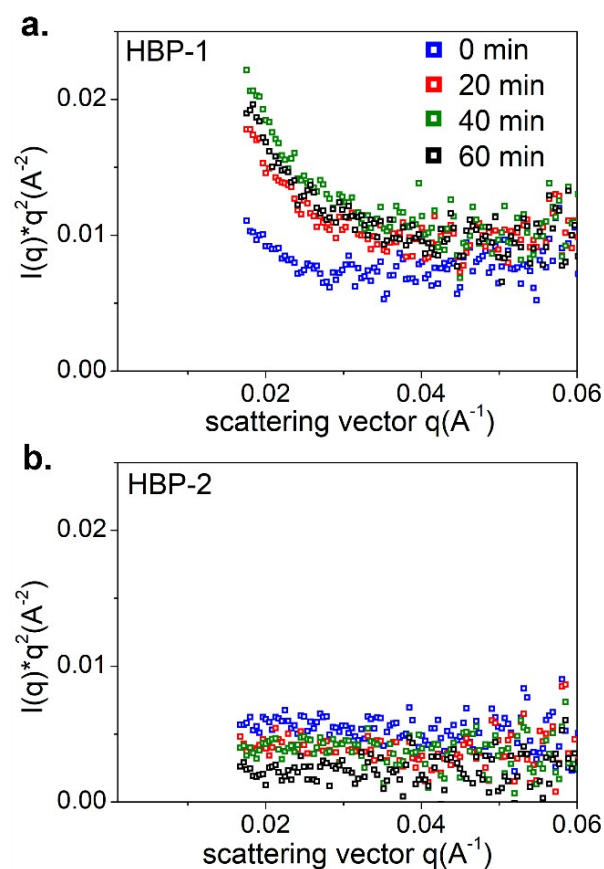

**Figure S3.** Small Angle X-ray Scattering at different coacervation time. Kratky plot of **(a)** HBP-1 and **(b)** HBP-2 coacervates at different times after dispersion.

### Supplementary Videos

HBP-1 and -2 coacervates were prepared by: adding protein stock solution (0.65 mM) to a 60 mM phosphate buffer (pH 6.5, IS 100 mM), with a protein : buffer volume ratio of 1:9.

- ESI\_video\_1** HBP-1 – part 1: formation of condensed coacervate, part 2: removal of buffer surrounding condensed coacervate, part 3: drying of the coacervate.
- ESI\_video\_2** HBP-2 – part 1: self-coacervation process, part 2: dispersion of the coacervate phase by pipetting.
- ESI\_video\_3** HBP-2 – part 1: formation of dispersed coacervate, part 2: drying of the coacervate.
